# Supplementary material for: 4-Dimethylaminopyridinium carbamoylides as stable and non-hazardous substitutes of arylsulfonyl and heteroaryl isocyanates
Source: Royal Society of Chemistry journal article supplement (doi:10.1039/b604376c), 2006-01-01
Supplement: b604376c.pdf [file b604376c.pdf]

## 4-Dimethylaminopyridinium carbamoylides as stable and non hazardous substitutes of arylsulfonyl and heteroaryl isocyanates

Franciszek Sączewski,\* Anita Kornicka and Zdzisław Brzozowski

*Department of Chemical Technology of Drugs, Medical University of Gdańsk,  
80-416 Gdańsk, Poland. E-mail: saczew@amg.gda.pl*

### Supplementary Data

The geometry of the sulfonylcarbamoylide **3a** was fully optimized using a molecular orbital *ab initio* method at the Hartree-Fock level of theory with the 6-31G\*\* basis set. The *ab initio* calculations were carried out using the SPARTAN program v. 5.0 distributed by Wavefunction Inc. and installed on a Silicon Graphics O2 workstation.

The optimized calculated values of the most relevant geometrical parameters [bond distances (Å) and angles (°)] are shown in Table 1.

The atomic charges were calculated using RHF/6-31G\*\* optimized structure and the results are presented in Figure 2.

Table 1. Selected theoretical bond distances (Å) and bond angles (°) for ylide **3a**<sup>a)</sup>.

| Bond      | (Å)   | Angle          | (°)    |
|-----------|-------|----------------|--------|
| C(1)-N(1) | 1.516 | N(1)-C(1)-O(1) | 113.83 |
| C(1)-O(1) | 1.198 | N(1)-C(1)-N(3) | 109.15 |
| C(1)-N(3) | 1.298 | O(1)-C(1)-N(3) | 137.00 |
| N(3)-S    | 1.623 | C(1)-N(3)-S    | 120.14 |
| S-O(2)    | 1.435 | N(3)-S-O(2)    | 111.14 |
| S-O(3)    | 1.434 | N(3)-S-O(3)    | 105.58 |
| N(1)-C(2) | 1.339 | O(2)-S-O(3)    | 118.89 |
| C(2)-C(3) | 1.359 |                |        |
| C(3)-C(4) | 1.417 |                |        |
| C(4)-N(2) | 1.340 |                |        |

<sup>a)</sup> Numbering scheme show in Figure 2.

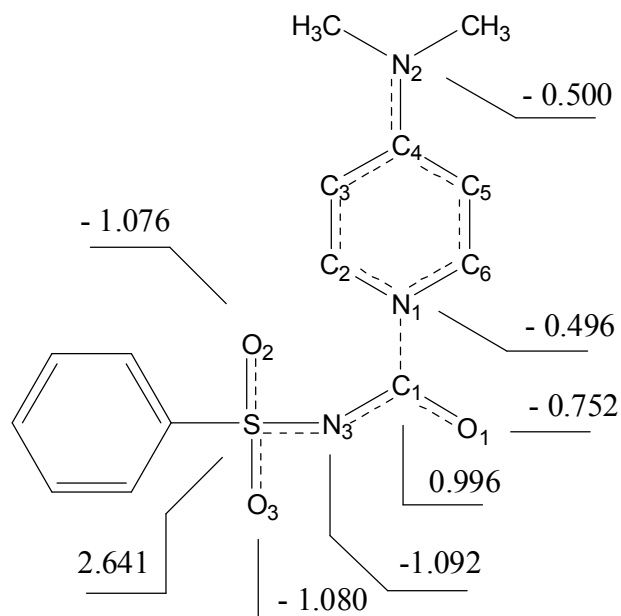

**Figure 2.** Molecular diagram of the ylide **3a** showing the natural atomic charges on selected atoms.

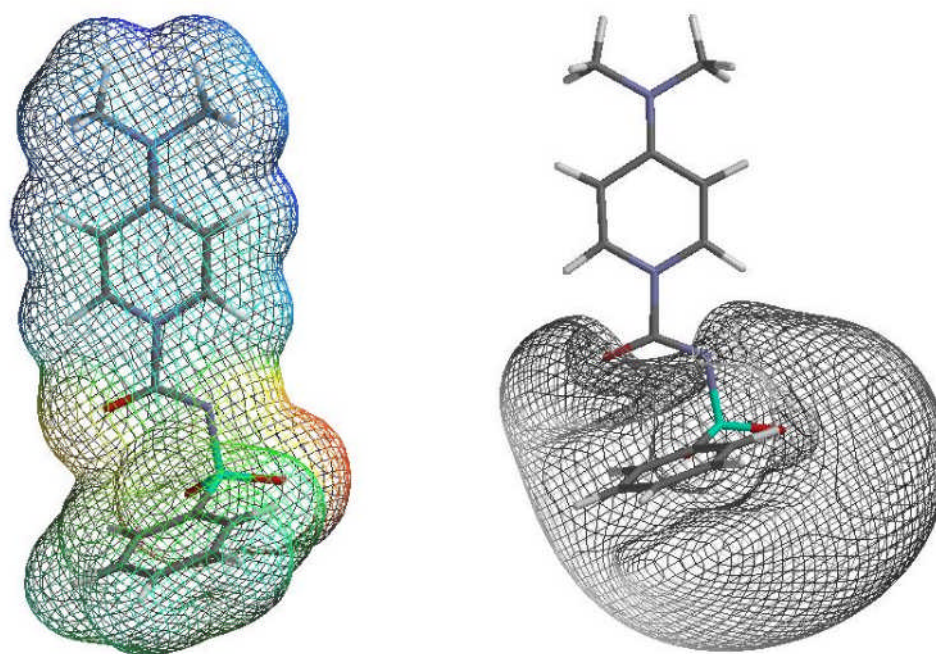

**Figure 3.** Absolute values of electrostatic potential mapped in colour onto the surface of electron density (*left*) and the electrostatic potential map of **3a** isocontoured at -20 kcal/mol (*right*).
